# Supplementary material for: Integrative Proteomic Analysis Reveals VMG Oncolytic Virus–Induced Molecular Reprogramming in Pancreatic Ductal Adenocarcinoma
Source: Research Square preprint supplement (doi:10.21203/rs.3.rs-9943137/v1), 2026-06-22
Supplement: Supplementary file 1 [file ad4ce85e80772f694915b201.xlsx]

## Sheet: GO_MF
Category	Term	Count	%	PValue	Genes	List Total	Pop Hits	Pop Total	Fold Enrichment	Bonferroni	Benjamini	FDR
GOTERM_MF_DIRECT	GO:0003723~RNA binding	49	17.8832	2.53351e-08	Q9NZJ9, Q96MX6, Q03701, Q8TDD1, Q96PU8, Q14692, Q6Y7W6, Q13243, Q969X6, Q13442, Q14011, Q13049, Q96G61, Q9NRX1, Q9H0L4, P46782, Q8IXT5, Q69YN4, Q5T200, Q5JTJ3, Q9BWF3, Q5JVF3, A0A024RBG1, Q8N3C0, O60508, Q9UIF9, Q9H9Y2, Q5F1R6, Q5RKV6, Q8NFP7, Q9HD15, Q7Z333, Q9UBQ5, Q15365, Q9HCG8, P29084, O75792, Q96G46, Q14CZ7, Q5PRF9, Q9Y3D9, Q9BYD3, Q9Y580, O15347, Q9NVN8, P78362, P09001, Q96T58, Q9BRJ7	267	1485	19253	2.37934	1.37315e-05	1.37316e-05	1.3529e-05
GOTERM_MF_DIRECT	GO:0005515~protein binding	225	82.1168	3.83319e-07	P15927, P61020, Q6ZVM7, Q14692, Q13243, Q92733, P48163, Q96G61, Q9UIQ6, Q9NRX1, P46782, P37275, Q9C0B5, Q9NVP2, P62487, P42858, Q9H270, Q9NUN5, P63218, Q13371, Q96SN8, O15400, O94916, Q9UQR1, Q8NE62, Q8N3C0, Q96ER9, P58317, P19823, Q6DD88, P02749, O60664, P40306, Q6NXS1, Q9UBU8, O94808, P06400, Q9C005, Q53H12, P54764, Q6PEY2, Q9Y2Z9, Q9BY43, Q9BY42, Q9P000, Q9HCG8, P29084, Q96G46, O60315, P21912,…	267	13690	19253	1.18513	0.000207737	0.000103879	0.000102346
GOTERM_MF_DIRECT	GO:0016787~hydrolase activity	17	6.20438	1.71612e-05	Q9NZJ9, Q6PEY2, Q9BRT8, Q6P2I3, Q8N3C0, Q5JTY5, Q8IUF1, Q96GK7, P15586, Q8TDD1, P0DPH7, P0DPH8, Q5VWZ2, Q7Z333, Q71U36, Q5RIA9, Q4V339	267	333	19253	3.68122	0.00925834	0.00230786	0.00227379
GOTERM_MF_DIRECT	GO:0034431~bis(5'-adenosyl)-hexaphosphatase activity	4	1.45985	2.55482e-05	Q96G61, Q9NZJ9, Q8NFP7, A0A024RBG1	267	5	19253	57.6869	0.0137519	0.00230786	0.00227379
GOTERM_MF_DIRECT	GO:0008486~diphosphoinositol-polyphosphate diphosphatase activity	4	1.45985	2.55482e-05	Q96G61, Q9NZJ9, Q8NFP7, A0A024RBG1	267	5	19253	57.6869	0.0137519	0.00230786	0.00227379
GOTERM_MF_DIRECT	GO:0000298~endopolyphosphatase activity	4	1.45985	2.55482e-05	Q96G61, Q9NZJ9, Q8NFP7, A0A024RBG1	267	5	19253	57.6869	0.0137519	0.00230786	0.00227379
GOTERM_MF_DIRECT	GO:0034432~bis(5'-adenosyl)-pentaphosphatase activity	4	1.45985	5.05735e-05	Q96G61, Q9NZJ9, Q8NFP7, A0A024RBG1	267	6	19253	48.0724	0.0270393	0.00391584	0.00385804
GOTERM_MF_DIRECT	GO:0005525~GTP binding	17	6.20438	0.00017838	P36915, P53365, Q6PEY2, Q9BRT8, Q5JTY5, Q8IUF1, P61020, P0DPH7, Q6DD88, P0DPH8, Q14692, Q71U36, Q5RIA9, Q9NVN8, P61586, Q4V339	267	406	19253	3.01933	0.092163	0.0120852	0.0119068
GOTERM_MF_DIRECT	GO:0016462~pyrophosphatase activity	4	1.45985	0.000396356	Q96G61, Q9NZJ9, Q8NFP7, A0A024RBG1	267	11	19253	26.2213	0.193352	0.0238694	0.0235171
GOTERM_MF_DIRECT	GO:0140827~zinc chaperone activity	3	1.09489	0.000565309	Q9BRT8, Q5RIA9, Q5JTY5	267	3	19253	72.1086	0.26397	0.0306397	0.0301875
GOTERM_MF_DIRECT	GO:0003729~mRNA binding	11	4.0146	0.0028234	Q96PU8, Q5PRF9, Q9BWF3, Q9H0L4, Q9BPZ3, P46782, O60508, Q96T58, Q15365, P00374	267	253	19253	3.13516	0.783993	0.13029	0.128367
GOTERM_MF_DIRECT	GO:0030371~translation repressor activity	4	1.45985	0.00288465	Q5PRF9, Q9BPZ3, Q13541, Q14011	267	21	19253	13.735	0.791066	0.13029	0.128367
GOTERM_MF_DIRECT	GO:0000987~cis-regulatory region sequence-specific DNA binding	5	1.82482	0.011217	Q04721, Q14186	267	63	19253	5.72291	0.997788	0.467663	0.46076
GOTERM_MF_DIRECT	GO:0051059~NF-kappaB binding	4	1.45985	0.0133037	Q04721	267	36	19253	8.01207	0.999296	0.515044	0.507442
GOTERM_MF_DIRECT	GO:0003697~single-stranded DNA binding	6	2.18978	0.0177118	P62487, P15927, P54132, P54725, Q8IY18, Q15365	267	109	19253	3.96928	0.999938	0.639852	0.630408
GOTERM_MF_DIRECT	GO:0071949~FAD binding	4	1.45985	0.0188886	Q9UHG3, Q9Y2Z9, Q9Y6N5, Q15067	267	41	19253	7.03499	0.999968	0.639852	0.630408
GOTERM_MF_DIRECT	GO:0000900~mRNA regulatory element binding translation repressor activity	3	1.09489	0.0251516	Q9BPZ3, P00374	267	18	19253	12.0181	0.999999	0.774334	0.762905
GOTERM_MF_DIRECT	GO:0046872~metal ion binding	53	19.3431	0.0277838	Q9NZJ9, Q9H8Y5, Q5JTY5, Q96AT9, Q9NX62, P10398, Q96GK7, Q9Y3A3, P15056, Q99643, P0DPH7, P0DPH8, P48163, P04049, Q96G61, Q52LW3, Q8TDX7, Q6P2I3, P0DPD8, Q5T200, O95365, Q8IUF1, P37275, P15586, Q9H270, O60293, A0A024RBG1, Q9UQR1, O96028, P49642, Q9BRT8, Q06203, Q9UIF9, P58317, Q8NFP7, Q9BUE6, Q5RIA9, Q99504, P36639, Q8N6T7, Q6PEY2, Q13107, O75792, Q96G46, O60315, P21912, Q99496, O60232, Q71U36, Q4V…	267	2904	19253	1.31603	1	0.774334	0.762905
GOTERM_MF_DIRECT	GO:0004709~MAP kinase kinase kinase activity	3	1.09489	0.0278583	P04049, P15056, P10398	267	19	19253	11.3856	1	0.774334	0.762905
GOTERM_MF_DIRECT	GO:0004864~protein phosphatase inhibitor activity	4	1.45985	0.0285732	Q8TCG1, O75663, Q6NXS1, P41236	267	48	19253	6.00905	1	0.774334	0.762905
GOTERM_MF_DIRECT	GO:0042803~protein homodimerization activity	18	6.56934	0.0329653	Q9C005, Q13555, Q13554, Q8N6T7, Q9BY43, P54132, O75223, P31350, Q8NBZ7, Q9NSV4, Q96AT9, Q8TCG1, Q9Y5X1, Q9BUL8, Q8TBA6, Q15276, Q15067	267	753	19253	1.72371	1	0.850819	0.838261
GOTERM_MF_DIRECT	GO:0030515~snoRNA binding	3	1.09489	0.036631	P36639, Q9NZJ9, Q9BRJ7	267	22	19253	9.83299	1	0.852194	0.839616
GOTERM_MF_DIRECT	GO:0004146~dihydrofolate reductase activity	2	0.729927	0.0408802	P00374	267	3	19253	48.0724	1	0.852194	0.839616
GOTERM_MF_DIRECT	GO:0016614~oxidoreductase activity, acting on CH-OH group of donors	2	0.729927	0.0408802	Q8NE62, Q9H9P8	267	3	19253	48.0724	1	0.852194	0.839616
GOTERM_MF_DIRECT	GO:0002153~steroid receptor RNA activator RNA binding	2	0.729927	0.0408802	Q9HD15	267	3	19253	48.0724	1	0.852194	0.839616
GOTERM_MF_DIRECT	GO:0050163~oxaloacetate tautomerase activity	2	0.729927	0.0408802	Q96GK7, Q6P2I3	267	3	19253	48.0724	1	0.852194	0.839616
GOTERM_MF_DIRECT	GO:0043130~ubiquitin binding	5	1.82482	0.0499653	Q6ZVM7, Q13049, P46934, Q96MX6, P54725	267	100	19253	3.60543	1	1	0.987061
GOTERM_MF_DIRECT	GO:0042296~ISG15 transferase activity	2	0.729927	0.0541335	Q96LR5, P51965	267	4	19253	36.0543	1	1	0.987061
GOTERM_MF_DIRECT	GO:0031369~translation initiation factor binding	3	1.09489	0.0568084	Q13049, P62487, Q13541	267	28	19253	7.72592	1	1	0.987061
GOTERM_MF_DIRECT	GO:0005200~structural constituent of cytoskeleton	5	1.82482	0.0716576	P0DPH7, P0DPH8, Q96RT1, Q6PEY2, Q71U36	267	113	19253	3.19065	1	1	0.987061
GOTERM_MF_DIRECT	GO:0071889~14-3-3 protein binding	3	1.09489	0.075902	Q9Y580, P78362, Q6ZS17	267	33	19253	6.55533	1	1	0.987061
GOTERM_MF_DIRECT	GO:0019899~enzyme binding	10	3.64964	0.0775131	P04049, P46934, Q04721, P15927, Q9H7L9, Q9GZT9, Q14165	267	375	19253	1.9229	1	1	0.987061
GOTERM_MF_DIRECT	GO:0019904~protein domain specific binding	7	2.55474	0.0830735	P46934, P53365, Q9HD15, Q9H270, Q14186, Q16254, Q15276	267	217	19253	2.32608	1	1	0.987061
GOTERM_MF_DIRECT	GO:0061631~ubiquitin conjugating enzyme activity	3	1.09489	0.0881933	Q96LR5, P51965, Q969T4	267	36	19253	6.00905	1	1	0.987061
GOTERM_MF_DIRECT	GO:0005484~SNAP receptor activity	3	1.09489	0.0966922	Q12981, Q15836, O15400	267	38	19253	5.69279	1	1	0.987061

## Sheet: GO_BP
Category	Term	Count	%	PValue	Genes	List Total	Pop Hits	Pop Total	Fold Enrichment	Bonferroni	Benjamini	FDR
GOTERM_BP_DIRECT	GO:0017148~negative regulation of translation	10	3.64964	7.81125e-06	Q96PU8, Q5PRF9, Q9BWF3, P54764, Q9BPZ3, Q6Y7W6, Q13541, P00374, Q14011	264	99	19478	7.45256	0.0111002	0.00426124	0.00420458
GOTERM_BP_DIRECT	GO:1901911~adenosine 5'-(hexahydrogen pentaphosphate) catabolic process	4	1.45985	2.38558e-05	Q96G61, Q9NZJ9, Q8NFP7, A0A024RBG1	264	5	19478	59.0242	0.0335158	0.00426124	0.00420458
GOTERM_BP_DIRECT	GO:1990705~cholangiocyte proliferation	4	1.45985	2.38558e-05	Q04721	264	5	19478	59.0242	0.0335158	0.00426124	0.00420458
GOTERM_BP_DIRECT	GO:2001204~regulation of osteoclast development	4	1.45985	2.38558e-05	Q04721	264	5	19478	59.0242	0.0335158	0.00426124	0.00420458
GOTERM_BP_DIRECT	GO:0071543~diphosphoinositol polyphosphate metabolic process	4	1.45985	2.38558e-05	Q96G61, Q9NZJ9, Q8NFP7, A0A024RBG1	264	5	19478	59.0242	0.0335158	0.00426124	0.00420458
GOTERM_BP_DIRECT	GO:0035622~intrahepatic bile duct development	4	1.45985	2.38558e-05	Q04721	264	5	19478	59.0242	0.0335158	0.00426124	0.00420458
GOTERM_BP_DIRECT	GO:1901907~diadenosine pentaphosphate catabolic process	4	1.45985	2.38558e-05	Q96G61, Q9NZJ9, Q8NFP7, A0A024RBG1	264	5	19478	59.0242	0.0335158	0.00426124	0.00420458
GOTERM_BP_DIRECT	GO:1901909~diadenosine hexaphosphate catabolic process	4	1.45985	2.38558e-05	Q96G61, Q9NZJ9, Q8NFP7, A0A024RBG1	264	5	19478	59.0242	0.0335158	0.00426124	0.00420458
GOTERM_BP_DIRECT	GO:0072104~glomerular capillary formation	4	1.45985	4.72344e-05	Q04721	264	6	19478	49.1869	0.0652719	0.00749977	0.00740006
GOTERM_BP_DIRECT	GO:0072014~proximal tubule development	4	1.45985	8.18341e-05	Q04721	264	7	19478	42.1602	0.110367	0.00941399	0.00928882
GOTERM_BP_DIRECT	GO:0061073~ciliary body morphogenesis	4	1.45985	8.18341e-05	Q04721	264	7	19478	42.1602	0.110367	0.00941399	0.00928882
GOTERM_BP_DIRECT	GO:0071228~cellular response to tumor cell	4	1.45985	8.18341e-05	Q04721	264	7	19478	42.1602	0.110367	0.00941399	0.00928882
GOTERM_BP_DIRECT	GO:0046849~bone remodeling	5	1.82482	8.56416e-05	Q04721, Q92791	264	18	19478	20.4945	0.115194	0.00941399	0.00928882
GOTERM_BP_DIRECT	GO:0003162~atrioventricular node development	4	1.45985	0.0001925	Q04721	264	9	19478	32.7912	0.24051	0.0196487	0.0193875
GOTERM_BP_DIRECT	GO:0072574~hepatocyte proliferation	4	1.45985	0.000272256	Q04721	264	10	19478	29.5121	0.322339	0.025937	0.0255921
GOTERM_BP_DIRECT	GO:0072015~podocyte development	4	1.45985	0.000489239	Q04721	264	12	19478	24.5934	0.503064	0.0411248	0.040578
GOTERM_BP_DIRECT	GO:0002315~marginal zone B cell differentiation	4	1.45985	0.000489239	Q04721	264	12	19478	24.5934	0.503064	0.0411248	0.040578
GOTERM_BP_DIRECT	GO:0036098~male germ-line stem cell population maintenance	3	1.09489	0.000540026	P0DPH7, P0DPH8, Q6PEY2	264	3	19478	73.7803	0.537868	0.042872	0.042302
GOTERM_BP_DIRECT	GO:0002011~morphogenesis of an epithelial sheet	4	1.45985	0.000629679	Q04721	264	13	19478	22.7016	0.593469	0.0473585	0.0467288
GOTERM_BP_DIRECT	GO:0051152~positive regulation of smooth muscle cell differentiation	4	1.45985	0.000793436	Q04721	264	14	19478	21.0801	0.678343	0.056691	0.0559373
GOTERM_BP_DIRECT	GO:0060674~placenta blood vessel development	4	1.45985	0.000981935	Q04721	264	15	19478	19.6747	0.754357	0.0637811	0.0629331
GOTERM_BP_DIRECT	GO:0060413~atrial septum morphogenesis	4	1.45985	0.000981935	Q04721	264	15	19478	19.6747	0.754357	0.0637811	0.0629331
GOTERM_BP_DIRECT	GO:0070986~left/right axis specification	4	1.45985	0.00170907	Q04721	264	18	19478	16.3956	0.913218	0.106185	0.104774
GOTERM_BP_DIRECT	GO:0032006~regulation of TOR signaling	4	1.45985	0.0020094	O43156, P04062, Q9H4H8, P10398	264	19	19478	15.5327	0.943545	0.119643	0.118052
GOTERM_BP_DIRECT	GO:0043011~myeloid dendritic cell differentiation	4	1.45985	0.00234057	Q04721	264	20	19478	14.7561	0.964866	0.128641	0.126931
GOTERM_BP_DIRECT	GO:0010838~positive regulation of keratinocyte proliferation	4	1.45985	0.00234057	Q04721	264	20	19478	14.7561	0.964866	0.128641	0.126931
GOTERM_BP_DIRECT	GO:0003184~pulmonary valve morphogenesis	4	1.45985	0.00270363	Q04721	264	21	19478	14.0534	0.979115	0.128783	0.12707
GOTERM_BP_DIRECT	GO:0045947~negative regulation of translational initiation	4	1.45985	0.00270363	Q9BWF3, Q9BPZ3, Q6Y7W6, Q13541	264	21	19478	14.0534	0.979115	0.128783	0.12707
GOTERM_BP_DIRECT	GO:0046579~positive regulation of Ras protein signal transduction	4	1.45985	0.00270363	Q04721	264	21	19478	14.0534	0.979115	0.128783	0.12707
GOTERM_BP_DIRECT	GO:0001709~cell fate determination	4	1.45985	0.00270363	Q04721	264	21	19478	14.0534	0.979115	0.128783	0.12707
GOTERM_BP_DIRECT	GO:0033138~positive regulation of peptidyl-serine phosphorylation	5	1.82482	0.00313429	P04049, P15056, Q99996, Q9BUL8, P10398	264	45	19478	8.19781	0.988734	0.144481	0.14256
GOTERM_BP_DIRECT	GO:0006886~intracellular protein transport	11	4.0146	0.00467304	P61020, O95487, P53365, Q92572, Q9H270, Q9Y5X1, Q15363, Q96AX1, Q71U36, O15400, Q99747	264	278	19478	2.91936	0.998761	0.202573	0.199879
GOTERM_BP_DIRECT	GO:0010828~positive regulation of D-glucose transmembrane transport	3	1.09489	0.00481979	P15056, Q86YS7, P01024	264	8	19478	27.6676	0.998996	0.202573	0.199879
GOTERM_BP_DIRECT	GO:0071459~protein localization to chromosome, centromeric region	3	1.09489	0.00481979	Q9NYP9, Q8IY18, P06400	264	8	19478	27.6676	0.998996	0.202573	0.199879
GOTERM_BP_DIRECT	GO:0006904~vesicle docking involved in exocytosis	4	1.45985	0.00502923	Q15836, O00471, Q9H270, Q9UPT5	264	26	19478	11.3508	0.999257	0.205336	0.202606
GOTERM_BP_DIRECT	GO:0002437~inflammatory response to antigenic stimulus	4	1.45985	0.00560208	Q04721	264	27	19478	10.9304	0.999674	0.216361	0.213485
GOTERM_BP_DIRECT	GO:1903076~regulation of protein localization to plasma membrane	4	1.45985	0.00560208	Q13555, Q13554, Q8N6T7, O15400	264	27	19478	10.9304	0.999674	0.216361	0.213485
GOTERM_BP_DIRECT	GO:0044281~small molecule metabolic process	3	1.09489	0.00760928	Q96GK7, Q6P2I3, Q9H9P8	264	10	19478	22.1341	0.999982	0.286149	0.282344
GOTERM_BP_DIRECT	GO:0045672~positive regulation of osteoclast differentiation	4	1.45985	0.00827492	Q04721	264	31	19478	9.52004	0.999993	0.303202	0.29917
GOTERM_BP_DIRECT	GO:0009887~animal organ morphogenesis	6	2.18978	0.00934346	P15056, Q04721, Q16254	264	95	19478	4.65981	0.999999	0.333795	0.329357
GOTERM_BP_DIRECT	GO:0006959~humoral immune response	5	1.82482	0.010379	Q04721, P40306	264	63	19478	5.85558	1	0.361745	0.356935
GOTERM_BP_DIRECT	GO:0001701~in utero embryonic development	9	3.28467	0.0111056	O95983, Q15293, Q04721, Q9NSV4, Q6ZT12	264	223	19478	2.97768	1	0.377854	0.37283
GOTERM_BP_DIRECT	GO:0000281~mitotic cytokinesis	5	1.82482	0.0115537	Q8WWK9, O00471, Q9UPT5, Q9Y5X1, P61586	264	65	19478	5.67541	1	0.383957	0.378852
GOTERM_BP_DIRECT	GO:0007017~microtubule-based process	4	1.45985	0.0144946	P0DPH7, P0DPH8, Q6PEY2, Q71U36	264	38	19478	7.76635	1	0.461339	0.455205
GOTERM_BP_DIRECT	GO:0097320~plasma membrane tubulation	3	1.09489	0.0148507	Q9UKS6, Q9BY43, Q9Y5X1	264	14	19478	15.8101	1	0.461339	0.455205
GOTERM_BP_DIRECT	GO:0009062~fatty acid catabolic process	3	1.09489	0.0148507	A8MXV4, Q9NUI1, Q15067	264	14	19478	15.8101	1	0.461339	0.455205
GOTERM_BP_DIRECT	GO:0001947~heart looping	5	1.82482	0.0163244	Q04721, Q15363	264	72	19478	5.12363	1	0.495544	0.488955
GOTERM_BP_DIRECT	GO:0030326~embryonic limb morphogenesis	4	1.45985	0.0166453	Q04721	264	40	19478	7.37803	1	0.495544	0.488955
GOTERM_BP_DIRECT	GO:0035264~multicellular organism growth	6	2.18978	0.018018	Q04721, Q6Y7W6, Q15363	264	112	19478	3.95252	1	0.525465	0.518478
GOTERM_BP_DIRECT	GO:0042060~wound healing	5	1.82482	0.02127	P04049, Q04721	264	78	19478	4.72951	1	0.60115	0.593157
GOTERM_BP_DIRECT	GO:0030513~positive regulation of BMP signaling pathway	4	1.45985	0.0214546	Q04721	264	44	19478	6.7073	1	0.60115	0.593157
GOTERM_BP_DIRECT	GO:0048024~regulation of mRNA splicing, via spliceosome	3	1.09489	0.0241012	Q96PU8, Q9HCG8, P78362	264	18	19478	12.2967	1	0.650177	0.641533
GOTERM_BP_DIRECT	GO:0006091~generation of precursor metabolites and energy	4	1.45985	0.0241143	Q14061, Q6NXS1, P41236, Q15067	264	46	19478	6.41568	1	0.650177	0.641533
GOTERM_BP_DIRECT	GO:0007030~Golgi organization	6	2.18978	0.0257979	Q6DD88, P42858, Q15363, Q8TBA6, Q9Y2L5	264	123	19478	3.59904	1	0.663847	0.655021
GOTERM_BP_DIRECT	GO:0014733~regulation of skeletal muscle adaptation	2	0.729927	0.0268232	Q13555, Q13554	264	2	19478	73.7803	1	0.663847	0.655021
GOTERM_BP_DIRECT	GO:0031427~response to methotrexate	2	0.729927	0.0268232	P00374	264	2	19478	73.7803	1	0.663847	0.655021
GOTERM_BP_DIRECT	GO:0006974~DNA damage response	10	3.64964	0.0268832	P36915, P46934, Q8TCG1, Q96LR5, Q96RU2, Q7Z333, P54132, Q8IY18, O94916, Q9NRF9	264	313	19478	2.3572	1	0.663847	0.655021
GOTERM_BP_DIRECT	GO:0034446~substrate adhesion-dependent cell spreading	4	1.45985	0.0269441	P15056, Q96AC1, Q15836, P61586	264	48	19478	6.14836	1	0.663847	0.655021
GOTERM_BP_DIRECT	GO:0006367~transcription initiation at RNA polymerase II promoter	4	1.45985	0.0284226	P62487, Q15370, P51946, P29084	264	49	19478	6.02288	1	0.688405	0.679252
GOTERM_BP_DIRECT	GO:0030509~BMP signaling pathway	5	1.82482	0.0291554	Q9Y4E8, Q04721	264	86	19478	4.28955	1	0.694386	0.685153
GOTERM_BP_DIRECT	GO:0034243~regulation of transcription elongation by RNA polymerase II	3	1.09489	0.0322178	Q9NVR2, P63272, Q96SY0	264	21	19478	10.54	1	0.75474	0.744705
GOTERM_BP_DIRECT	GO:0006915~apoptotic process	16	5.83942	0.0335885	P04049, Q12981, Q8WWK9, Q04721, Q9HD15, P42858, Q96MX6, Q9H7L9, Q9BUL8, P29966, Q969H8, Q15276	264	656	19478	1.79952	1	0.77416	0.763867
GOTERM_BP_DIRECT	GO:0043149~stress fiber assembly	3	1.09489	0.0351296	O60315, P15056, P61586	264	22	19478	10.061	1	0.796828	0.786233
GOTERM_BP_DIRECT	GO:0000122~negative regulation of transcription by RNA polymerase II	21	7.66423	0.0359864	Q9UQR1, O96028, O95983, Q8N6T7, O95365, Q9UNF1, O60315, P37275, P46934, Q04721, P63272, Q06546, Q99496, Q9H7L9, Q96T58, P06400, Q9NRF9	264	958	19478	1.61731	1	0.800844	0.790196
GOTERM_BP_DIRECT	GO:0000278~mitotic cell cycle	6	2.18978	0.0364275	P0DPH7, P0DPH8, Q6PEY2, O60232, Q99496, Q71U36	264	135	19478	3.27912	1	0.800844	0.790196
GOTERM_BP_DIRECT	GO:0051924~regulation of calcium ion transport	3	1.09489	0.0381391	Q13555, Q13554, Q9H3N1	264	23	19478	9.62352	1	0.82577	0.814791
GOTERM_BP_DIRECT	GO:0048710~regulation of astrocyte differentiation	2	0.729927	0.0399648	Q96PU8, P54764	264	3	19478	49.1869	1	0.852383	0.84105
GOTERM_BP_DIRECT	GO:0016241~regulation of macroautophagy	4	1.45985	0.0417602	P46934, P21283, Q9UPT5, P04062	264	57	19478	5.17757	1	0.877577	0.865909
GOTERM_BP_DIRECT	GO:0051604~protein maturation	5	1.82482	0.0424889	O14618, Q9BRT8, Q9BUE6, Q5RIA9, Q5JTY5	264	97	19478	3.80311	1	0.87995	0.86825
GOTERM_BP_DIRECT	GO:0070534~protein K63-linked ubiquitination	4	1.45985	0.0436132	Q13049, P46934, Q96LR5, Q969T4	264	58	19478	5.0883	1	0.890332	0.878494
GOTERM_BP_DIRECT	GO:1902895~positive regulation of miRNA transcription	4	1.45985	0.0494139	Q04721	264	61	19478	4.83805	1	0.994542	0.981318
GOTERM_BP_DIRECT	GO:0000209~protein polyubiquitination	6	2.18978	0.0505969	Q14139, Q13049, Q9UIQ6, Q96LR5, P51965, Q969T4	264	148	19478	2.99109	1	1	0.987395
GOTERM_BP_DIRECT	GO:0046452~dihydrofolate metabolic process	2	0.729927	0.0529296	P00374	264	4	19478	36.8902	1	1	0.987395
GOTERM_BP_DIRECT	GO:0021859~pyramidal neuron differentiation	2	0.729927	0.0529296	P04062, Q71U36	264	4	19478	36.8902	1	1	0.987395
GOTERM_BP_DIRECT	GO:0042776~proton motive force-driven mitochondrial ATP synthesis	4	1.45985	0.0577006	P21912, Q99643, Q9Y6M9, O43678	264	65	19478	4.54033	1	1	0.987395
GOTERM_BP_DIRECT	GO:0072659~protein localization to plasma membrane	6	2.18978	0.0580873	Q9C0B5, O00471, Q15363, Q86YS7, O75781, Q14156	264	154	19478	2.87456	1	1	0.987395
GOTERM_BP_DIRECT	GO:0030097~hemopoiesis	4	1.45985	0.0598687	Q04721	264	66	19478	4.47153	1	1	0.987395
GOTERM_BP_DIRECT	GO:0033617~mitochondrial cytochrome c oxidase assembly	3	1.09489	0.0616864	Q5JTJ3, Q14061, Q14CZ7	264	30	19478	7.37803	1	1	0.987395
GOTERM_BP_DIRECT	GO:0016192~vesicle-mediated transport	8	2.91971	0.0626463	O60664, Q92572, Q15836, Q9H270, Q96AX1, O15400, Q99747, Q15276	264	259	19478	2.27893	1	1	0.987395
GOTERM_BP_DIRECT	GO:0006346~DNA methylation-dependent constitutive heterochromatin formation	3	1.09489	0.06537	O95983, Q9UIF9	264	31	19478	7.14003	1	1	0.987395
GOTERM_BP_DIRECT	GO:0006121~mitochondrial electron transport, succinate to ubiquinone	2	0.729927	0.0657199	P21912, Q99643	264	5	19478	29.5121	1	1	0.987395
GOTERM_BP_DIRECT	GO:0046654~tetrahydrofolate biosynthetic process	2	0.729927	0.0657199	P00374	264	5	19478	29.5121	1	1	0.987395
GOTERM_BP_DIRECT	GO:0009060~aerobic respiration	4	1.45985	0.0665981	P21912, Q99643, Q9Y6M9, O43678	264	69	19478	4.27712	1	1	0.987395
GOTERM_BP_DIRECT	GO:0006260~DNA replication	5	1.82482	0.0741601	P15927, P54132, O95251, O75792, Q9NRF9	264	117	19478	3.153	1	1	0.987395
GOTERM_BP_DIRECT	GO:0015031~protein transport	12	4.37956	0.0743981	Q6ZVM7, P61020, Q9BY43, Q15836, O00471, Q9UPT5, Q8WYP5, Q9BTX1, Q15363, Q96AX1, Q5JVF3, Q15276	264	496	19478	1.78501	1	1	0.987395
GOTERM_BP_DIRECT	GO:0007219~Notch signaling pathway	5	1.82482	0.075989	Q04721, Q96T58	264	118	19478	3.12628	1	1	0.987395
GOTERM_BP_DIRECT	GO:0072344~rescue of stalled ribosome	3	1.09489	0.0768405	Q6Y7W6, Q8N3C0, Q9H8Y5	264	34	19478	6.51003	1	1	0.987395
GOTERM_BP_DIRECT	GO:0061025~membrane fusion	3	1.09489	0.0768405	Q15836, Q99747, Q15276	264	34	19478	6.51003	1	1	0.987395
GOTERM_BP_DIRECT	GO:0032020~ISG15-protein conjugation	2	0.729927	0.0783382	Q96LR5, P51965	264	6	19478	24.5934	1	1	0.987395
GOTERM_BP_DIRECT	GO:0006397~mRNA processing	8	2.91971	0.0814277	Q96PU8, Q9BWF3, Q9HD15, Q69YN4, Q5T200, Q9HCG8, Q13243, Q96G46	264	276	19478	2.13856	1	1	0.987395
GOTERM_BP_DIRECT	GO:0006338~chromatin remodeling	15	5.47445	0.0832935	P04049, O96028, Q8TDX7, O95983, Q8N6T7, Q9UIF9, O95365, P10398, P15056, Q99496, Q9H7L9, Q99504, P06400, Q9NRF9	264	686	19478	1.61327	1	1	0.987395
GOTERM_BP_DIRECT	GO:0042274~ribosomal small subunit biogenesis	4	1.45985	0.0887164	Q9NRX1, P46782, Q14692, Q969X6	264	78	19478	3.78361	1	1	0.987395
GOTERM_BP_DIRECT	GO:0045787~positive regulation of cell cycle	3	1.09489	0.0888883	Q13049, P78362, P54725	264	37	19478	5.98219	1	1	0.987395
GOTERM_BP_DIRECT	GO:2000121~regulation of removal of superoxide radicals	2	0.729927	0.0907867	P00374	264	7	19478	21.0801	1	1	0.987395
GOTERM_BP_DIRECT	GO:0036089~cleavage furrow formation	2	0.729927	0.0907867	Q9Y5X1, P61586	264	7	19478	21.0801	1	1	0.987395
GOTERM_BP_DIRECT	GO:0090158~endoplasmic reticulum membrane organization	2	0.729927	0.0907867	Q6P1A2, Q15363	264	7	19478	21.0801	1	1	0.987395
GOTERM_BP_DIRECT	GO:0032436~positive regulation of proteasomal ubiquitin-dependent protein catabolic process	4	1.45985	0.0940018	Q8N6T7, Q15370, P04062, P54725	264	80	19478	3.68902	1	1	0.987395
GOTERM_BP_DIRECT	GO:0045732~positive regulation of protein catabolic process	4	1.45985	0.0966922	Q13049, P46934, Q9H270, Q6ZT12	264	81	19478	3.64347	1	1	0.987395
GOTERM_BP_DIRECT	GO:0006368~transcription elongation by RNA polymerase II	3	1.09489	0.097209	P63272, Q15370, Q5JVF3	264	39	19478	5.67541	1	1	0.987395
GOTERM_BP_DIRECT	GO:0006302~double-strand break repair	4	1.45985	0.0994138	O96028, Q8N6T7, Q7Z333, Q99504	264	82	19478	3.59904	1	1	0.987395

## Sheet: GO_CC
Category	Term	Count	%	PValue	Genes	List Total	Pop Hits	Pop Total	Fold Enrichment	Bonferroni	Benjamini	FDR
GOTERM_CC_DIRECT	GO:0005829~cytosol	125	45.6204	1.65048e-11	P53004, P53365, Q9Y426, A8MXV4, O75663, Q96AT9, Q96RU2, Q96AC1, Q13243, P62875, Q969T4, P48163, Q96G61, Q9UIQ6, Q9NRX1, P46782, Q69YN4, P37275, P46934, Q9NVP2, Q99996, P42858, Q14186, Q13371, Q96SN8, A0A024RBG1, P00374, O94916, Q15276, Q9BZX2, Q15836, Q8N3C0, Q5F1R6, Q9Y4E8, Q8NFP7, Q9HD15, O60664, Q9NVI1, Q9Y5X1, P25788, P40306, Q9NZ08, Q99627, Q13541, O94808, P06400, Q53H12, Q9BY43, Q9P000, Q9H…	267	5713	20795	1.70409	6.38736e-09	4.29971e-09	4.24416e-09
GOTERM_CC_DIRECT	GO:0005654~nucleoplasm	100	36.4964	2.22207e-11	Q13555, Q13554, P15927, Q5T3J3, P54132, P11802, P51946, O75781, P53801, Q9NX62, Q9UNF1, Q03701, Q8TDD1, Q96RU2, Q96AC1, Q14692, Q13243, Q969X6, P29966, P62875, Q92733, Q969T4, Q14011, Q8TDX7, Q8WUD4, Q9NRX1, Q9H0L4, P46782, Q8IXT5, Q69YN4, Q5T200, Q9BUB7, Q8IY18, P37275, Q9BWF3, P46934, Q5JTJ3, Q9C0B5, Q9NVP2, P62487, P42858, Q8WYP5, Q14186, Q9UJX4, O94916, Q9UQR1, O96028, P49642, Q9BRT9, Q8N3C0,…	267	4107	20795	1.89637	8.5994e-09	4.29971e-09	4.24416e-09
GOTERM_CC_DIRECT	GO:0005634~nucleus	122	44.5255	6.38098e-08	Q9Y426, P15927, O43156, P53801, Q03701, Q8TDD1, P0DPH7, Q96RU2, P0DPH8, Q96AC1, P62875, Q92733, Q969T4, Q96G61, Q9NRX1, Q69YN4, Q8IUF1, P37275, P46934, Q9NVP2, P62487, Q96RT1, P42858, Q14186, O60293, A0A024RBG1, O94916, Q9UQR1, O96028, Q8N3C0, P58317, Q9Y4E8, Q8NFP7, Q9HD15, Q7Z333, P25788, P40306, Q9UBU8, Q99627, Q13541, Q99504, P06400, Q16254, Q9C005, O95983, Q6PEY2, Q9BY43, Q9BY42, O43427, Q9H…	267	6244	20795	1.52175	2.46941e-05	8.23146e-06	8.12511e-06
GOTERM_CC_DIRECT	GO:0005737~cytoplasm	113	41.2409	2.43496e-06	P53365, O43156, P53801, Q9Y3A3, P0DPH7, P0DPH8, Q96AC1, P48163, Q96G61, Q9UIQ6, P46782, Q8NBZ7, Q8IUF1, P46934, Q99996, Q5VVW2, Q14061, Q96RT1, P42858, Q14186, Q13371, Q96SN8, Q6ZT12, A0A024RBG1, O96028, Q9BZX2, Q5F1R6, Q9Y4E8, Q8NFP7, Q9HD15, O60664, Q7Z333, Q9BUE6, Q9NVI1, Q9Y5X1, P25788, P40306, Q9NZ08, Q99627, Q13541, Q99504, P06400, Q16254, Q53H12, P54764, O95983, Q6PEY2, Q9BY43, Q9NQP4, Q5P…	267	6004	20795	1.46584	0.000941888	0.000235583	0.000232539
GOTERM_CC_DIRECT	GO:0005794~Golgi apparatus	31	11.3139	0.000112112	Q9UQR1, Q13610, P80303, P53365, Q969H8, Q9NX62, Q8TDD1, Q9Y3A3, Q92572, O60664, P04062, Q6Y7W6, Q15363, Q99747, Q9C005, P04049, Q9Y2Z9, Q9P000, P54725, P46934, Q99996, Q96K37, Q04721, P42858, Q96SN8, Q92520, P98194, Q9BUL8, Q8TBA6, Q6ZS17	267	1122	20795	2.15187	0.0424619	0.00867747	0.00856536
GOTERM_CC_DIRECT	GO:0005739~mitochondrion	41	14.9635	0.000165676	Q8TB22, A8MXV4, Q9BQP7, Q8NE62, O43678, Q96ER9, Q8NI60, P10398, Q96GK7, P15056, Q99643, Q6NVY1, Q9Y4E8, Q9Y6M9, Q5VWZ2, Q9BUE6, Q5XKP0, Q9H9P8, Q99747, P48163, Q13049, P04049, Q53H12, P36639, Q13505, Q9Y2Z9, Q6P2I3, O43427, Q9Y6N5, Q9BUB7, Q9NQP4, Q14CZ7, P21912, Q5JTJ3, Q9Y3D9, O14618, Q14061, Q9BYD3, P09001, P00374	267	1721	20795	1.85546	0.0621092	0.0106861	0.010548
GOTERM_CC_DIRECT	GO:0016607~nuclear speck	16	5.83942	0.000716128	Q69YN4, O43427, Q5T200, Q8N3C0, Q9HCG8, O60508, Q9UIF9, Q8IY18, Q9BWF3, Q96RT1, P78362, Q9UBU8, Q13243, P29966, Q15365, Q92733	267	449	20795	2.77537	0.242128	0.0395916	0.0390801
GOTERM_CC_DIRECT	GO:0005743~mitochondrial inner membrane	16	5.83942	0.00245027	Q53H12, Q9Y2Z9, Q8NE62, Q9Y6N5, O43678, Q96ER9, Q9BUB7, P21912, Q9Y3D9, Q99643, Q9Y6M9, Q9BYD3, P09001, Q5XKP0, Q9H9P8, P00374	267	509	20795	2.44822	0.613034	0.118532	0.117
GOTERM_CC_DIRECT	GO:0005929~cilium	13	4.74453	0.0067939	P15056, P0DPH7, Q8WWK9, Q04721, P0DPH8, Q6PEY2, Q9HD15, Q13371, Q71U36, P29966	267	410	20795	2.46949	0.928511	0.292137	0.288363
GOTERM_CC_DIRECT	GO:0030133~transport vesicle	6	2.18978	0.00965263	O60664, Q92572, Q15836, Q15363, Q8TBA6	267	101	20795	4.62677	0.976569	0.373557	0.368731
GOTERM_CC_DIRECT	GO:0030123~AP-3 adaptor complex	3	1.09489	0.0115859	Q92572, Q9H270, Q96AX1	267	13	20795	17.9732	0.989	0.387608	0.3826
GOTERM_CC_DIRECT	GO:0043231~intracellular membrane-bounded organelle	23	8.39416	0.0122102	Q53H12, P80303, Q12981, P53365, Q8WWK9, Q8N6T7, Q9H0L4, Q15836, Q96BY7, P54725, Q03701, P61020, P15056, Q99996, Q8TCG1, Q92572, Q9HD15, Q9NUN5, Q92791, Q15363, Q9UJ83, Q9GZT9, Q15276	267	1022	20795	1.75277	0.991387	0.387608	0.3826
GOTERM_CC_DIRECT	GO:0030136~clathrin-coated vesicle	5	1.82482	0.0130204	Q15836, Q9NUN5, Q9H270, Q9Y5X1, Q96AX1	267	71	20795	5.48478	0.99373	0.387608	0.3826
GOTERM_CC_DIRECT	GO:0032991~protein-containing complex	17	6.20438	0.0169212	Q52LW3, O95983, P54132, Q5JS54, P54725, Q9BWF3, P46934, Q9NVP2, Q96RU2, P42858, Q9H270, Q6Y7W6, Q5JVF3, Q99627, P01024, Q15276	267	691	20795	1.9161	0.998646	0.46656	0.460532
GOTERM_CC_DIRECT	GO:0005768~endosome	10	3.64964	0.0180837	Q6ZVM7, P61020, Q9UKS6, O60664, Q9BY43, Q9H270, Q6Y7W6, O15400, P61586, Q15276	267	308	20795	2.5287	0.999143	0.46656	0.460532
GOTERM_CC_DIRECT	GO:0031201~SNARE complex	4	1.45985	0.0234495	Q12981, Q15836, O15400, Q99747	267	48	20795	6.49032	0.999897	0.562688	0.555418
GOTERM_CC_DIRECT	GO:0005938~cell cortex	7	2.55474	0.0247176	P46934, P53365, Q96AC1, Q9HD67, Q86YS7, P61586, P29966	267	174	20795	3.13326	0.999938	0.562688	0.555418
GOTERM_CC_DIRECT	GO:0030659~cytoplasmic vesicle membrane	6	2.18978	0.0282957	Q9UIQ6, Q92572, P42858, Q9Y5X1, Q15363, Q86YS7	267	133	20795	3.51356	0.999985	0.585887	0.578318
GOTERM_CC_DIRECT	GO:0005694~chromosome	9	3.28467	0.0287645	Q13610, O96028, Q8TCG1, P54132, Q14692, O95251, O15347, Q969X6, Q8IY18	267	281	20795	2.4945	0.999988	0.585887	0.578318
GOTERM_CC_DIRECT	GO:0032580~Golgi cisterna membrane	5	1.82482	0.0359985	Q9Y3A3, Q15363, Q8NBZ7, P98194, Q8TBA6	267	97	20795	4.01463	0.999999	0.696571	0.687571
GOTERM_CC_DIRECT	GO:0015630~microtubule cytoskeleton	8	2.91971	0.0401364	Q8WWK9, P0DPH7, P0DPH8, Q6PEY2, Q9HD15, Q9H4H8, Q71U36	267	247	20795	2.52256	1	0.739657	0.730101
GOTERM_CC_DIRECT	GO:0045273~respiratory chain complex II (succinate dehydrogenase)	2	0.729927	0.0501963	P21912, Q99643	267	4	20795	38.9419	1	0.829662	0.818943
GOTERM_CC_DIRECT	GO:0035189~Rb-E2F complex	2	0.729927	0.0501963	Q14186, P06400	267	4	20795	38.9419	1	0.829662	0.818943
GOTERM_CC_DIRECT	GO:0000151~ubiquitin ligase complex	5	1.82482	0.0514519	Q14139, P46934, Q99496, P51965, Q6ZT12	267	109	20795	3.57266	1	0.829662	0.818943
GOTERM_CC_DIRECT	GO:0030139~endocytic vesicle	4	1.45985	0.0585614	P61020, Q9H270, O15400, Q15276	267	69	20795	4.51501	1	0.90653	0.894818
GOTERM_CC_DIRECT	GO:0005954~calcium- and calmodulin-dependent protein kinase complex	2	0.729927	0.0623481	Q13555, Q13554	267	5	20795	31.1536	1	0.911555	0.899778
GOTERM_CC_DIRECT	GO:0070062~extracellular exosome	38	13.8686	0.0635969	P53004, P80303, P50452, O75223, Q96AT9, P53801, Q6ZVM7, P61020, P19823, Q9BVC6, P02749, P04062, Q9Y5X1, P25788, P61586, Q9NZ08, Q99627, P29966, Q15365, Q99747, Q9UKS6, Q9UHG3, P21283, P46782, Q8NBZ7, P15586, P46934, P63218, Q8WYP5, Q96SN8, Q92520, Q71U36, O15400, Q9BUL8, Q96T58, P01024, Q6ZS17, Q6PL18	267	2242	20795	1.32007	1	0.911555	0.899778
GOTERM_CC_DIRECT	GO:0045171~intercellular bridge	5	1.82482	0.0683309	Q9HD15, Q7Z333, Q9H4H8, Q53H96	267	120	20795	3.24516	1	0.944431	0.932229
GOTERM_CC_DIRECT	GO:0032040~small-subunit processome	4	1.45985	0.0714606	Q9NRX1, P46782, Q14692, Q969X6	267	75	20795	4.15381	1	0.95363	0.941309
GOTERM_CC_DIRECT	GO:0012505~endomembrane system	9	3.28467	0.0806574	P61020, P80303, Q9C0B5, O43427, Q96AX1, O15400, Q9H3N1, P98194, Q9NX62	267	349	20795	2.00847	1	1	0.989637
GOTERM_CC_DIRECT	GO:0033263~CORVET complex	2	0.729927	0.0861889	Q9H270, Q96AX1	267	7	20795	22.2525	1	1	0.989637
GOTERM_CC_DIRECT	GO:0033017~sarcoplasmic reticulum membrane	3	1.09489	0.0887274	Q13555, Q13554, Q9BVC6	267	39	20795	5.99107	1	1	0.989637
GOTERM_CC_DIRECT	GO:0005776~autophagosome	4	1.45985	0.090439	Q13049, P42858, Q9H270, Q96AX1	267	83	20795	3.75344	1	1	0.989637
